# Supplementary material for: DOT1L inhibition attenuates graft-versus-host disease by allogeneic T cells in adoptive immunotherapy models
Source: PubMed Central journal article supplement (PMC5954061; doi:10.1038/s41467-018-04262-0), 2018-05-15
Supplement: 41467_2018_4262_MOESM3_ESM.pdf [file 41467_2018_4262_MOESM3_ESM.pdf]

## Description of Additional Supplementary Files

File Name: Supplementary Data 1

Description: RNA sequencing analysis of differentially expressed genes between SGC0946- and DMSO-treated CD8+ T cells. Genes with P values  $<0.01$  (paired two-sided t-test), FDR  $<0.1$  and fold change of FPKM values  $>1.5$  or  $<0.66$  are shown.

File Name: Supplementary Data 2

Description: Differentially expressed genes following T cell stimulation retrieved from the publicly available data (GSE13887, paired two-sided t-test).
